# Supplementary material
Source: Springer Nature journal article supplement (https://www.springermedizin.de/resource/supplementary/12891_2012_1939_MOESM4_ESM.pdf/9508598)

Relationship between revision rates CAS/TKA

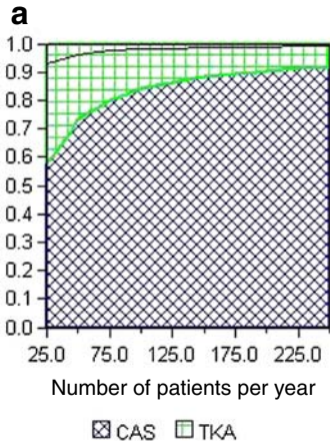

Relationship between revision rates CAS/TKA

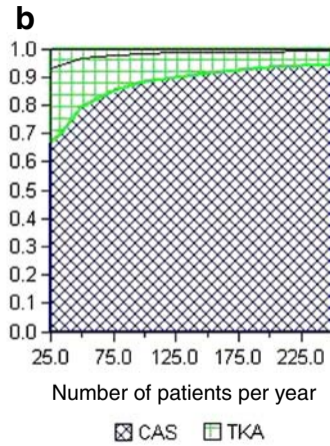

Supplement: MOESM4 [file 9508598]
